# Supplementary material for: Novel Sources of Pre-Harvest Sprouting Resistance for Japonica Rice Improvement
Source: MDPI journal article supplement (doi:10.3390/plants10081709), 2021-08-19
Supplement: s1 [file s1]

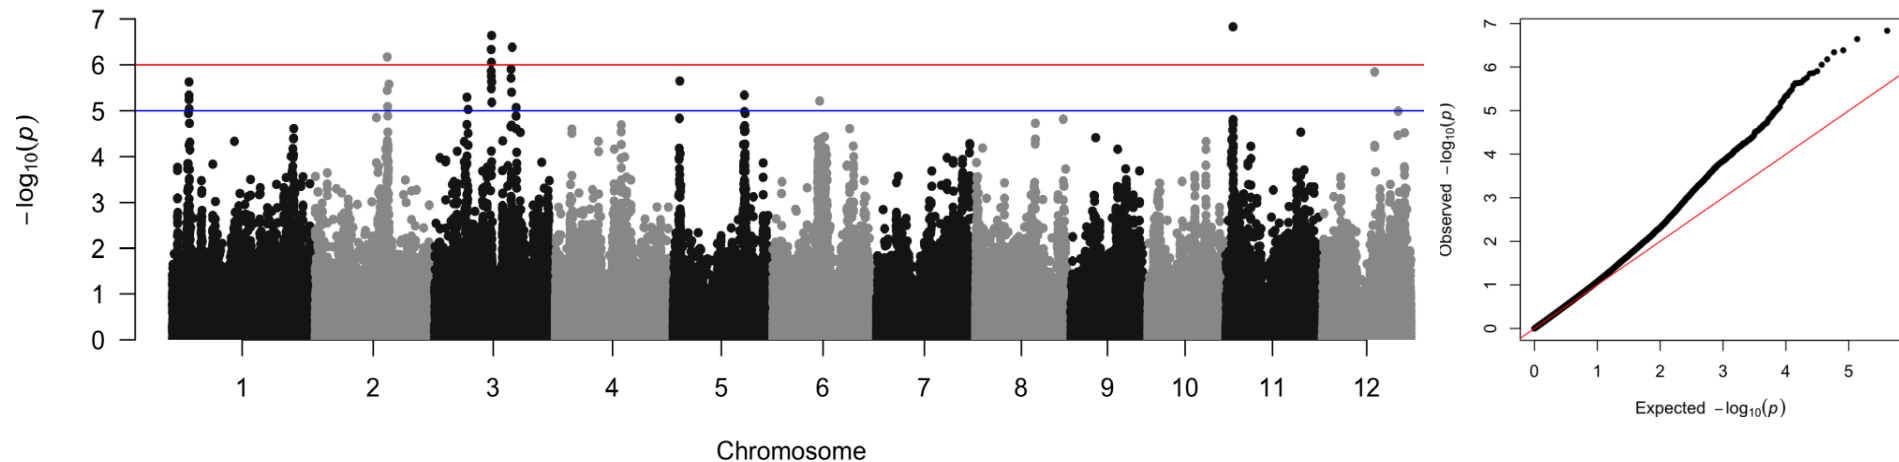

**Supplementary Material S1.** Genome-wide association analysis of pre-harvest sprouting (PHS) in the complete dataset (24 Indica and 253 Japonica rice accessions). Manhattan and Quantile-quantile plots were generated through the mixed linear model (MLM) with kinship matrix and principal components. Points above the blue and red threshold lines indicate significant association at  $-\log_{10}(p)=5$  and 6, respectively.
