# Supplementary material for: Novel Sources of Pre-Harvest Sprouting Resistance for Japonica Rice Improvement
Source: Plants (Basel). 2021 Aug 19;10(8):1709. doi: 10.3390/plants10081709 (PMC8401653; doi:10.3390/plants10081709)
Supplement: Supplementary file 1 [file plants-10-01709-s001.zip › Supplementary Material S2.xlsx]

## Sheet: Supplementary Material S2
No.	Group	IRGC No.	FID	Variety name	Origin country	PHS resistance (%)
						20 DAF	30 DAF
1	indica	IRGC 117442	IRIS_313-8292	CARREON::IRGC 32575-1	Philippines	100	97.555
2	indica	IRGC 121342	IRIS_313-9817	GEANT W 7::IRGC 9620-1	Netherlands	91.892	78.0807
3	indica	IRGC 122011	IRIS_313-7664	CICA 8::C1	Colombia	97.5522	95.7741
4	indica	IRGC 125729	IRIS_313-9533	DUD KUNING::IRGC 44-1	Indonesia	98.2349	96.2222
5	indica	IRGC 125901	IRIS_313-9320	SIPULUT HITAM PENDEK::IRGC 20154-1	Indonesia	95.1587	97.4731
6	indica	IRGC 125905	IRIS_313-9120	SONAPATNAI::IRGC 46695-1	India	97.3382	95.144
7	indica	IRGC 126204	IRIS_313-8571	ES 21::IRGC 56171-1	Tanzania	100	83.0102
8	indica	IRGC 126289	IRIS_313-8305	URAIBOOL::IRGC 52785-1	India	100	93.5374
9	indica	IRGC 127102	IRIS_313-11510	A 69-1::IRGC 55305-1	Sri Lanka	97.132	85.5714
10	indica	IRGC 127319	IRIS_313-11525	DIAMBARANG::IRGC 56726-1	Guinea-Bissau	100	96.5589
11	indica	IRGC 127320	IRIS_313-11723	DISSIGBE::IRGC 66916-1	Guinea	97.779	87.5774
12	indica	IRGC 127408	IRIS_313-12128	HMA GNENG::IRGC 85751-1	Laos	98.8333	85.3084
13	indica	IRGC 127411	IRIS_313-11607	HOLDIGANTHI::IRGC 61105-1	India	99.3001	99.496
14	indica	IRGC 127493	IRIS_313-11816	KARILETYONE::IRGC 70745-1	Myanmar	98.629	98.3051
15	indica	IRGC 127845	IRIS_313-11787	TANDAKAY FINGO::IRGC 69793-1	Gambia	99.1018	95.5094
16	indica	IRGC 127909	IRIS_313-11438	ZACATEPEC A 79::IRGC 51116-1	Mexico	97.8208	95.392
17	indica	IRGC 127941	IRIS_313-11256	ARC 12411::IRGC 41047-2	India	99.2509	95.5004
18	indica	IRGC 128075	IRIS_313-11205	KAZALSAIL::IRGC 37161-2	Bangladesh	100	90.1275
19	indica	IRGC 128395	IRIS_313-11916	MUDALIGA WEE::IRGC 74706-1	Sri Lanka	97.6601	97.5233
20	indica	IRGC 128411	IRIS_313-11786	N'YA NOFF::IRGC 69749-1	Gambia	99.5098	95.3809
21	indica	IRGC 131971	IRIS_313-11674	BEUA KAE::IRGC 64221-1	Thailand	99.5585	93.5427
22	indica	IRGC 132036	IRIS_313-11810	PULURE::IRGC 70647-1	Kenya	95.713	94.1829
23	indica	IRGC 132308	IRIS_313-11222	DUDHSWAR 15-157::IRGC 37967-2	Bangladesh	96.3891	97.8233
24	indica	IRGC 132372	IRIS_313-11813	ZERO::IRGC 70707-2	Kenya	98.9583	95.3269
25	temp	IRGC 117474	IRIS_313-8256	GERDEH::IRGC 32301-1	Iran	93.4729	64.3011
26	temp	IRGC 117518	IRIS_313-9002	KOTOBUKI MOCHI::IRGC 2545-1	Japan	31.3549	42.2816
27	temp	IRGC 117537	IRIS_313-8690	NEP HOA VANG::IRGC 40748-2	Vietnam	100	64.4767
28	temp	IRGC 121242	IRIS_313-9438	7507-137::IRGC 40081-1	Japan	60.1101	28.7126
29	temp	IRGC 121246	IRIS_313-9724	AI DA ZHONG::IRGC 59348-1	China	88.2964	49.796
30	temp	IRGC 121249	IRIS_313-9814	AMARELO::IRGC 9389-1	Hungary	82.0497	56.6428
31	temp	IRGC 121471	IRIS_313-9880	PI 282203::IRGC 16292-1	Hungary	41.6667	53.5444
32	temp	IRGC 121501	IRIS_313-9346	SHINCHIKU IKU 103::IRGC 10430-1	Taiwan	25.9111	41.1141
33	temp	IRGC 121541	IRIS_313-8890	WIR 1072::IRGC 57496-1	Belgium	82.5728	9.51367
34	temp	IRGC 121816	IRIS_313-8134	S 102/2::GERVEX 1251-C1	Portugal	64.2352	22.559
35	temp	IRGC 121817	IRIS_313-8204	S 102::GERVEX 1671-C1	United States	70.5854	27.4408
36	temp	IRGC 121818	IRIS_313-8135	SAEDINENIE::GERVEX 1255-C1	Bulgaria	75.5896	67.8503
37	temp	IRGC 121819	IRIS_313-8136	SAFARI::GERVEX 1256-C1	Portugal	53.6627	5.0454
38	temp	IRGC 121972	IRIS_313-8171	AUZGUSTA::GERVEX 1634-C1	Hungary	66.2097	35.3465
39	temp	IRGC 121996	IRIS_313-8109	CAMPINO::GERVEX 824-C1	Portugal	94.7576	39.6166
40	temp	IRGC 121998	IRIS_313-8084	CAPATAZ::GERVEX 521-C1	Spain	49.1304	37.5097
41	temp	IRGC 122001	IRIS_313-8111	CARRICO::GERVEX 828-C1	Portugal	29.1156	14.4722
42	temp	IRGC 122007	IRIS_313-8112	CHIPKA::GERVEX 837-C1	Bulgaria	22.2521	32.7768
43	temp	IRGC 122013	IRIS_313-8165	CIGALON::GERVEX 1514-C1	France	81.4284	39.7286
44	temp	IRGC 122024	IRIS_313-8160	CT 58::GERVEX 1491-C1	Colombia	80.7692	30.0409
45	temp	IRGC 122043	IRIS_313-8113	ESCARLATE::GERVEX 887-C1	Portugal	97.0433	42.6634
46	temp	IRGC 122045	IRIS_313-8114	FAISCA::GERVEX 900-C1	Portugal	87.6838	59.7935
47	temp	IRGC 122049	IRIS_313-8099	FLIPPER::GERVEX 597-C1	Italy	53.7106	85.0407
48	temp	IRGC 122078	IRIS_313-8075	HARRA::GERVEX 501-C1	Australia	84.4854	37.5683
49	temp	IRGC 122085	IRIS_313-8118	IBO 400::GERVEX 943-C1	Portugal	85.3801	30.101
50	temp	IRGC 122142	IRIS_313-8155	KULON::GERVEX 1473-C1	Russia	46.277	22.383
51	temp	IRGC 122149	IRIS_313-8033	LOMELLINO::GERVEX 83-C1	Italy	6.66544	19.4927
52	temp	IRGC 122151	IRIS_313-8039	LOTO::GERVEX 104-C1	Italy	59.9655	11.8056
53	temp	IRGC 122152	IRIS_313-8208	LUSITO IRRADIADO 859-85-2::GERVEX 1676-C1	Portugal	71.413	25.0801
54	temp	IRGC 122162	IRIS_313-8090	MARENY::GERVEX 535-C1	Spain	53.3423	11.4548
55	temp	IRGC 122166	IRIS_313-8170	MEJANES 2::GERVEX 1560-C1	France	72.1466	34.2889
56	temp	IRGC 122170	IRIS_313-8050	MIARA::GERVEX 129-C1	Italy	80.3789	43.9145
57	temp	IRGC 122175	IRIS_313-8123	MUGA::GERVEX 1099-C1	Portugal	42.5984	37.3915
58	temp	IRGC 122183	IRIS_313-8200	OPALE::GERVEX 1667-C1	Italy	79.3839	27.3585
59	temp	IRGC 122187	IRIS_313-8124	OTA::GERVEX 1145-C1	Portugal	85.3675	27.5815
60	temp	IRGC 122202	IRIS_313-8032	PIEMONTE::GERVEX 81-C1	Italy	65.8627	49.129
61	temp	IRGC 122203	IRIS_313-8125	PLOVDIV 22::GERVEX 1167-C1	Bulgaria	22.4225	21.191
62	temp	IRGC 122204	IRIS_313-8126	PLOVDIV 24::GERVEX 1168-C1	Bulgaria	75.0065	31.0229
63	temp	IRGC 122208	IRIS_313-8128	PRECOZ 2 F A::GERVEX 1182-C1	Argentina	93.6367	26.7508
64	temp	IRGC 122217	IRIS_313-8024	RIBE 253::GERVEX 54-C1	Italy	33.1235	25.7952
65	temp	IRGC 122219	IRIS_313-8129	RODINA::GERVEX 1234-C1	Bulgaria	76.5443	9.68687
66	temp	IRGC 122222	IRIS_313-8216	ROXANI::GERVEX 1686-C1	Greece	78.1658	20.0323
67	temp	IRGC 122223	IRIS_313-8162	RPC 12::GERVEX 1505-C1	China	62.6973	27.8317
68	temp	IRGC 122229	IRIS_313-8132	RUBI::GERVEX 1247-C1	Portugal	57.5853	42.6789
69	temp	IRGC 122230	IRIS_313-8031	RUBINO::GERVEX 80-C1	Italy	71.4463	43.7137
70	temp	IRGC 122233	IRIS_313-8217	SAKHA 102::GERVEX 1687-C1	Egypt	54.5788	9.77551
71	temp	IRGC 122234	IRIS_313-8218	SAKHA 103::GERVEX 1688-C1	Egypt	83.4681	61.7021
72	temp	IRGC 122235	IRIS_313-8138	SALOIO::GERVEX 1259-C1	Portugal	79.951	35.3513
73	temp	IRGC 122241	IRIS_313-8140	SANGHAI::GERVEX 1264-C1	China	90.453	34.4578
74	temp	IRGC 122244	IRIS_313-8141	SELN 244 A 6-20::GERVEX 1273-C1	Australia	50.6173	21.1597
75	temp	IRGC 122249	IRIS_313-8142	SETTANTUNO::GERVEX 1279-C1	Portugal	59.6253	3.53075
76	temp	IRGC 122251	IRIS_313-8095	SHSS 53::GERVEX 550-C1	Spain	30.2656	18.0954
77	temp	IRGC 122253	IRIS_313-8052	SMERALDO::GERVEX 138-C1	Italy	86.7531	16.3607
78	temp	IRGC 122256	IRIS_313-8096	SR 113::GERVEX 553-C1	Spain	29.4817	11.9444
79	temp	IRGC 122257	IRIS_313-8145	SUPER::GERVEX 1304-C1	Portugal	82.1344	8.76024
80	temp	IRGC 122259	IRIS_313-8147	T 757::GERVEX 1316-C1	India	65.4912	28.1121
81	temp	IRGC 122265	IRIS_313-8105	THAIPERLA::GERVEX 696-C1	United States	60.2799	20.9367
82	temp	IRGC 122267	IRIS_313-8148	TIMICH 108::GERVEX 1325-C1	Romania	31.4105	21.9319
83	temp	IRGC 122268	IRIS_313-8149	TOPAZIO::GERVEX 1332-C1	Portugal	68.182	16.552
84	temp	IRGC 122271	IRIS_313-8097	ULLAL::GERVEX 556-C1	Spain	71.7493	16.1894
85	temp	IRGC 122273	IRIS_313-8151	VALTEJO::GERVEX 1355-C1	Portugal	50.2646	13.6741
86	temp	IRGC 122300	IRIS_313-8164	YRM 6-2::GERVEX 1508-C1	Australia	80.5782	49.2671
87	temp	IRGC 125610	IRIS_313-8387	FU LI HONG::IRGC 70250-1	China	93.0862	50.7956
88	temp	IRGC 125620	IRIS_313-8502	M 102::IRGC 76307-1	United States	85.6369	26.4946
89	temp	IRGC 125631	IRIS_313-9140	81 A 32::IRGC 60162-1	China	25.933	25.5622
90	temp	IRGC 125698	IRIS_313-10092	CHALBYEO::IRGC 77639-1	South Korea	66.1944	23.4349
91	temp	IRGC 125700	IRIS_313-10093	CHEONJUDO::IRGC 77644-1	South Korea	67.6692	25.025
92	temp	IRGC 125701	IRIS_313-9703	CHIANAN 8::IRGC 90-1	Taiwan	65.7314	43.7174
93	temp	IRGC 125707	IRIS_313-10057	CHUGOKU 68 HEN::IRGC 72514-1	Japan	69.554	39.8856
94	temp	IRGC 125709	IRIS_313-9233	CHUNG YI::IRGC 1427-1	China	64.5001	24.8275
95	temp	IRGC 125710	IRIS_313-9463	CI 1600::IRGC 16305-1	United States	51.7094	92.6627
96	temp	IRGC 125717	IRIS_313-10059	DACHEONGBYEO::IRGC 72533-1	South Korea	66.5883	15.144
97	temp	IRGC 125718	IRIS_313-9725	DA DAO TOU::IRGC 59499-1	China	82.3565	42.3371
98	temp	IRGC 125743	IRIS_313-9884	FUKUSHIMA MOCHI (GLUT)::IRGC 19296-1	Japan	72.798	39.7853
99	temp	IRGC 125757	IRIS_313-10164	HAN NUO::IRGC 59591-1	China	74.6627	10.8475
100	temp	IRGC 125758	IRIS_313-10228	HAN NUO::IRGC 82350-1	China	82.1116	32.759
101	temp	IRGC 125761	IRIS_313-9974	HEUKSANJO::IRGC 55536-1	South Korea	55.9781	30.0075
102	temp	IRGC 125764	IRIS_313-9228	HOKUSETSU::IRGC 65705-1	Japan	95.7179	86.9865
103	temp	IRGC 125767	IRIS_313-9886	HUK ZO::IRGC 19760-1	South Korea	65.8011	33.0854
104	temp	IRGC 125768	IRIS_313-9379	HWANGJO::IRGC 55547-1	South Korea	87.6608	35.6596
105	temp	IRGC 125781	IRIS_313-9790	JAPONES BALILLA::IRGC 5785-1	Uruguay	70.716	36.8696
106	temp	IRGC 125784	IRIS_313-9887	JEUK DO::IRGC 19775-1	South Korea	53.5733	29.3745
107	temp	IRGC 125787	IRIS_313-10096	JOKJEBICHAL::IRGC 77663-1	South Korea	83.5631	10.5983
108	temp	IRGC 125788	IRIS_313-9698	JO SANG DAE YA::IRGC 90852-1	North Korea	30.1804	21.5574
109	temp	IRGC 125791	IRIS_313-10089	KALIN::IRGC 77312-1	Bulgaria	19.2791	12.0665
110	temp	IRGC 125794	IRIS_313-9249	KANU DAM::IRGC 29755-1	Cambodia	98.3766	96.2358
111	temp	IRGC 125808	IRIS_313-9811	KOPANCSI KEREK::IRGC 9305-1	Hungary	100	76.695
112	temp	IRGC 125830	IRIS_313-10097	MAEKJO::IRGC 77666-1	South Korea	75.731	48.865
113	temp	IRGC 125846	IRIS_313-9769	MURASAHITSUTSURI::IRGC 2493-1	Japan	87.2285	88.2762
114	temp	IRGC 125856	IRIS_313-9468	NONG KE::IRGC 59807-1	China	64.4563	42.0665
115	temp	IRGC 125860	IRIS_313-9759	OEIRAS::IRGC 286-1	Portugal	62.5527	45.9616
116	temp	IRGC 125862	IRIS_313-9839	O. SATIVA::IRGC 12876-1	Spain	95.7175	83.7868
117	temp	IRGC 125888	IRIS_313-9937	ROCCA::IRGC 50351-1	Italy	78.913	76.0305
118	temp	IRGC 125893	IRIS_313-8856	S 201::IRGC 55230-1	United States	59.3138	15.7706
119	temp	IRGC 125908	IRIS_313-9813	SZANISZLO 2::IRGC 9353-1	Hungary	66.4767	38.483
120	temp	IRGC 125910	IRIS_313-9702	TAICHUNG 179::IRGC 85-1	Taiwan	88.6355	52.5959
121	temp	IRGC 125911	IRIS_313-9701	TAICHUNG 65::IRGC 79-1	Taiwan	35.9731	39.9451
122	temp	IRGC 125915	IRIS_313-9081	TAKAO MOCHI::IRGC 2564-1	Japan	66.4039	33.6821
123	temp	IRGC 125919	IRIS_313-9838	TEPUKE::IRGC 12872-1	New Zealand	76.9748	19.2522
124	temp	IRGC 125920	IRIS_313-9539	TEXAS PATNA 49::IRGC 6077-1	United States	35.587	37.7558
125	temp	IRGC 125934	IRIS_313-9890	WA BANG::IRGC 19880-1	South Korea	86.6515	36.4043
126	temp	IRGC 125938	IRIS_313-9964	WIR 1951::IRGC 51643-1	Georgia	34.4213	48.6642
127	temp	IRGC 125939	IRIS_313-9961	WIR 884::IRGC 51591-1	Norway	90.2595	24.5039
128	temp	IRGC 125945	IRIS_313-9891	YONG AN HUK::IRGC 19891-1	South Korea	53.6873	53.7832
129	temp	IRGC 125980	IRIS_313-10379	IR 73688-57-2::IRGC 117383-1	Philippines	58.9793	16.0674
130	temp	IRGC 126027	IRIS_313-10373	IR 68333-R-R-B-19::IRGC 117381-1	Philippines	57.5284	39.6724
131	temp	IRGC 126050	IRIS_313-10258	BULI INIA::IRGC 116961-1	Chile	91.4158	71.9036
132	temp	IRGC 126113	IRIS_313-8399	68-2::IRGC 14546-1	France	84.2206	32.3018
133	temp	IRGC 126118	IRIS_313-8444	M 203::IRGC 76309-1	United States	85.1546	21.4021
134	temp	IRGC 126120	IRIS_313-8755	NORIN 6::IRGC 2633-1	Japan	70.7446	31.2467
135	temp	IRGC 126185	IRIS_313-9771	BERGREIS::IRGC 3150-1	Austria	66.4264	21.5807
136	temp	IRGC 126198	IRIS_313-8481	DAN YAN NUO::IRGC 4860-1	China	14.738	30.2906
137	temp	IRGC 126990	IRIS_313-9996	SUWEON 295::IRGC 58368-1	South Korea	64.5885	22.8401
138	temp	IRGC 127036	IRIS_313-9782	BENLLOK::IRGC 3404-1	Peru	92.1429	52.4323
139	temp	IRGC 127074	IRIS_313-10242	H 305-84::IRGC 116988-1	Hungary	87.9146	52.3145
140	temp	IRGC 127285	IRIS_313-11702	CN 1067::IRGC 65680-1	United States	83.0084	48.8322
141	temp	IRGC 127608	IRIS_313-11803	MAO ZHA NUO::IRGC 70335-1	China	38.3049	13.0089
142	temp	IRGC 127642	IRIS_313-10440	NAGKAYAT::IRGC 584-1	Philippines	88.6029	62.4116
143	temp	IRGC 127798	IRIS_313-10631	SHINCHIKU IKU 97::IRGC 10429-1	Taiwan	43.396	30.8419
144	temp	IRGC 127815	IRIS_313-11655	SI WAN 14::IRGC 63019-1	China	56.97	24.0286
145	temp	IRGC 127834	IRIS_313-10429	TAICHUNG 150::IRGC 80-1	Taiwan	87.034	33.3673
146	temp	IRGC 127920	IRIS_313-11202	4583::IRGC 36894-2	China	47.7037	21.4308
147	temp	IRGC 128209	IRIS_313-10564	250 KUNGANI 1::IRGC 7370-1	Japan	57.7715	36.0483
148	temp	IRGC 128252	IRIS_313-11890	C 722323::IRGC 73147-1	Taiwan	90.0438	18.9113
149	temp	IRGC 128262	IRIS_313-11875	CHUBU 17::IRGC 72505-1	Japan	62.3246	8.09379
150	temp	IRGC 128275	IRIS_313-11689	DECHANGBYEO::IRGC 64858-1	South Korea	74.366	63.1384
151	temp	IRGC 128284	IRIS_313-11908	DUAN SHEN ZI::IRGC 73962-1	China	93.3333	37.4134
152	temp	IRGC 128299	IRIS_313-10430	GINMASARI::IRGC 242-1	Japan	67.8422	33.9955
153	temp	IRGC 128303	IRIS_313-11652	GONG SHE 9::IRGC 62693-1	China	71.7969	37.2052
154	temp	IRGC 128312	IRIS_313-12054	HUA 24::IRGC 82127-1	China	25.7308	26.8528
155	temp	IRGC 128315	IRIS_313-10967	IAS 22-8 PALMAR::IRGC 26058-1	Brazil	24.7259	25.889
156	temp	IRGC 128326	IRIS_313-11155	K 113::IRGC 34107-1	India	68.7084	60.1921
157	temp	IRGC 128364	IRIS_313-12059	LIGEN 2::IRGC 82398-1	China	90.5873	42.0051
158	temp	IRGC 128370	IRIS_313-11578	LUAN DAO::IRGC 59762-1	China	56.7928	30.6532
159	temp	IRGC 128384	IRIS_313-11653	MA SHE 8::IRGC 62750-1	China	32.0892	19.7376
160	temp	IRGC 128396	IRIS_313-11829	MUNJI::IRGC 70928-1	Pakistan	77.0085	53.5714
161	temp	IRGC 128434	IRIS_313-11654	PL 3165::IRGC 62827-1	China	68.0072	32.1181
162	temp	IRGC 128445	IRIS_313-11672	RAI MANULA::IRGC 64138-1	Nepal	97.6852	92.5895
163	temp	IRGC 128455	IRIS_313-10642	SACHIKAZE::IRGC 10891-1	Japan	92.5636	37.7229
164	temp	IRGC 128501	IRIS_313-12217	WEONJU 8::IRGC 90845-1	South Korea	92.4304	55.896
165	temp	IRGC 128502	IRIS_313-11536	WIR 2091::IRGC 57536-1	Georgia	100	96.8886
166	temp	IRGC 128507	IRIS_313-10840	YE ZO::IRGC 19888-1	South Korea	59.1439	28.303
167	temp	IRGC 128508	IRIS_313-11584	YI SUI QI::IRGC 60088-1	China	61.4341	42.5265
168	temp	IRGC 128509	IRIS_313-12061	YUNLEN 13::IRGC 82402-1	China	93.6643	7.68298
169	temp	IRGC 128514	IRIS_313-11725	ZUIHOU::IRGC 66982-1	Japan	69.3658	15.7492
170	temp	IRGC 128517	IRIS_313-11153	CT 45::IRGC 34027-2	India	98.8545	80.506
171	temp	IRGC 128519	IRIS_313-11336	IREQUIN::IRGC 44476-2	Philippines	63.9655	47.4514
172	temp	IRGC 131960	IRIS_313-11661	91-382::IRGC 63464-1	Bhutan	88.1272	55.275
173	temp	IRGC 132020	IRIS_313-11973	NOINJO::IRGC 77669-1	South Korea	66.7082	43.3492
174	temp	IRGC 132043	IRIS_313-11981	TAICHUNG 188::IRGC 78209-1	Taiwan	57.4969	53.53
175	temp	IRGC 132271	IRIS_313-11246	7516-14::IRGC 40090-3	Japan	66.8254	40.0924
176	temp	IRGC 132313	IRIS_313-11586	36037-1::IRGC 60177-2	China	100	53.4009
177	temp	IRGC 132323	IRIS_313-10837	BACK KYUNG ZO::IRGC 19698-2	South Korea	64.5323	48.5657
178	temp	IRGC 132370	IRIS_313-10838	SSAL BYEO::IRGC 19867-2	South Korea	65.9984	29.1279
179	temp	IRGC 132425	IRIS_313-11198	K 78-13::IRGC 36794-2	India	81.1887	45.5652
180	temp	IRGC 136098	IRIS_313-11800	FAN GENG 6::IRGC 70243-1	China	62.3457	54.1367
181	trop	IRGC 117535	IRIS_313-8927	NABESHI::IRGC 8269-1	Taiwan	58.664	7.00826
182	trop	IRGC 121949	IRIS_313-7838	62667::C1	Senegal	56.2242	30.8243
183	trop	IRGC 121964	IRIS_313-8027	ANSEATICO::GERVEX 67-C1	Italy	93.4333	67.3129
184	trop	IRGC 122018	IRIS_313-7866	CNA 7\BO\1\1>33-13-6-1::C1	Colombia	70.7909	49.1862
185	trop	IRGC 122021	IRIS_313-7868	CT 13582-15-5-M::C1	Colombia	95.3177	65.7679
186	trop	IRGC 122027	IRIS_313-7870	CUIABANA::IRTP 17401-C1	Brazil	37.3188	9.10013
187	trop	IRGC 122070	IRIS_313-8213	GRAAL::GERVEX 1682-C1	France	51.7729	31.51
188	trop	IRGC 122109	IRIS_313-8010	IR 71524-44-1-1::C1	Philippines	35.3983	37.1749
189	trop	IRGC 122119	IRIS_313-7922	IRAT 234::C1	French Guiana	92.9723	35.7098
190	trop	IRGC 122128	IRIS_313-7933	KAKANI 2::IRGC 13373-C1	Nepal	15.9369	15.8775
191	trop	IRGC 122275	IRIS_313-7992	VARY LAVA 90::GERVEX 8254-C1	Madagascar	67.7325	53.3675
192	trop	IRGC 122281	IRIS_313-8011	VIETNAM 1::C1	Vietnam	59.6583	23.5372
193	trop	IRGC 125614	IRIS_313-8285	KATY::IRGC 77140-1	United States	69.3618	50.2369
194	trop	IRGC 125622	IRIS_313-8400	RIKUTO NORIN MOCHI 20::IRGC 410-1	Japan	95.4226	34.6846
195	trop	IRGC 125630	IRIS_313-8872	571::IRGC 48493-1	Thailand	50.4019	41.837
196	trop	IRGC 125703	IRIS_313-9267	CHIRGUA 1 I 22::IRGC 3408-1	Venezuela	50.3294	41.5361
197	trop	IRGC 125714	IRIS_313-10272	COLOMBIA 1::IRGC 116970-1	Colombia	85.1607	68.4079
198	trop	IRGC 125720	IRIS_313-9529	DAGPA BARA::IRGC 64887-1	Bhutan	85.5219	37.8351
199	trop	IRGC 125725	IRIS_313-8876	DELITUS::IRGC 5769-1	France	95.4583	44.4868
200	trop	IRGC 125750	IRIS_313-10094	GAWICHAL::IRGC 77653-1	South Korea	53.1984	44.6786
201	trop	IRGC 125780	IRIS_313-8815	JANA (NAM)::IRGC 64897-1	Bhutan	79.5238	25.5549
202	trop	IRGC 125793	IRIS_313-8857	KAMNAM::IRGC 64902-1	Bhutan	95.4772	95.3695
203	trop	IRGC 125857	IRIS_313-9995	NONGLIMNA 1::IRGC 58347-1	South Korea	87.9709	47.085
204	trop	IRGC 125885	IRIS_313-9789	RIKUTO TAUKI MOCHI 27::IRGC 5726-1	Japan	94.0826	66.0045
205	trop	IRGC 125936	IRIS_313-9519	WANICA::IRGC 3394-1	Suriname	91.4585	26.2066
206	trop	IRGC 125992	IRIS_313-8578	KHAU TRA BONG::IRGC 78342-1	Vietnam	64.418	37.2113
207	trop	IRGC 126010	IRIS_313-8694	TRES MESES::IRGC 6464-1	Brazil	69.4985	25.5689
208	trop	IRGC 126037	IRIS_313-8572	ONOY::IRGC 55418-1	Philippines	49.1149	57.0374
209	trop	IRGC 126057	IRIS_313-9928	DEO KITAN::IRGC 47197-1	Philippines	84.656	56.9318
210	trop	IRGC 126059	IRIS_313-9405	INGSA BELANAK::IRGC 43402-1	Indonesia	47.4371	36.2477
211	trop	IRGC 126155	IRIS_313-9297	KORR::IRGC 30751-1	Liberia	95.851	68.127
212	trop	IRGC 126179	IRIS_313-8637	BALINGMI::IRGC 62156-1	Bhutan	20.5742	8.78196
213	trop	IRGC 126225	IRIS_313-8769	KOSAGI::IRGC 57692-1	Guinea	83.3404	42.9999
214	trop	IRGC 126303	IRIS_313-10099	MANONGAZATO::IRGC 77876-1	Madagascar	82.85	67.8666
215	trop	IRGC 126329	IRIS_313-8687	KEREN FENHO::IRGC 56735-1	Guinea-Bissau	58.8875	74.1743
216	trop	IRGC 126959	IRIS_313-15907	INIA TACUARI::G1	Uruguay	96.455	88.3096
217	trop	IRGC 126969	IRIS_313-15905	WAB 56-125::IRTP 19771-G1	Ivory Coast	79.8657	44.4786
218	trop	IRGC 126977	IRIS_313-9851	GOGOWIERIE::IRGC 14791-1	Suriname	88.5134	33.5355
219	trop	IRGC 127043	IRIS_313-8486	DAGPA MRAS::IRGC 62166-1	Bhutan	94.4176	40.4602
220	trop	IRGC 127245	IRIS_313-11379	CADIDIT (GLUT)::IRGC 47161-1	Philippines	69.5764	69.7805
221	trop	IRGC 127370	IRIS_313-11434	FORTUNA BLANCO (SAN MARCOS)::IRGC 50764-1	Colombia	55.4883	26.8838
222	trop	IRGC 127429	IRIS_313-10830	INAPORAONAN::IRGC 19418-1	Philippines	52.6007	32.9875
223	trop	IRGC 127502	IRIS_313-11117	KAYELI KUNING::IRGC 31974-1	Indonesia	71.8885	41.4983
224	trop	IRGC 127522	IRIS_313-11156	KHUDWANI ACC 202::IRGC 34154-1	India	61.7989	34.5959
225	trop	IRGC 127676	IRIS_313-11248	NIAW KHAMIN::IRGC 40222-1	Thailand	70.6609	56.324
226	trop	IRGC 127701	IRIS_313-11329	PADI JALAI BELA::IRGC 44084-1	Malaysia	68.4355	64.4446
227	trop	IRGC 127723	IRIS_313-12164	PA YANG NOEUGN::IRGC 87778-1	Cambodia	63.3782	52.1676
228	trop	IRGC 127730	IRIS_313-10992	PILIT TAPUL::IRGC 26887-1	Philippines	94.9783	79.5456
229	trop	IRGC 127749	IRIS_313-11009	PULUT HALAPA::IRGC 27403-1	Indonesia	75.7277	57.2442
230	trop	IRGC 127807	IRIS_313-11424	SINAPLED::IRGC 50402-1	Philippines	90.4857	60.4076
231	trop	IRGC 127943	IRIS_313-10888	ARC 12726::IRGC 22288-2	India	90.7125	81.2109
232	trop	IRGC 128084	IRIS_313-11075	KHAO NAM YEN::IRGC 29546-2	Laos	38.1064	36.7033
233	trop	IRGC 128086	IRIS_313-11093	KHAO TAM::IRGC 30085-2	Laos	83.2606	18.7028
234	trop	IRGC 128135	IRIS_313-10710	PINDE GOGO WIERIE::IRGC 14795-2	Suriname	63.1979	34.3789
235	trop	IRGC 128150	IRIS_313-10552	RL GOPHER::IRGC 6934-2	United States	83.6572	46.9157
236	trop	IRGC 128226	IRIS_313-10893	ARC 13156::IRGC 22514-1	India	96.1253	37.8509
237	trop	IRGC 128233	IRIS_313-10708	B 6311 A 5553-16-2::IRGC 14541-1	United States	78.6629	54.2062
238	trop	IRGC 128260	IRIS_313-11426	CHATAO::IRGC 50456-1	Brazil	84.8937	15.0897
239	trop	IRGC 128293	IRIS_313-12018	FRENSI GBOI::IRGC 79983-1	Sierra Leone	86.0284	47.3123
240	trop	IRGC 128295	IRIS_313-11427	GEM OU BRAZIL::IRGC 50470-1	Brazil	87.0249	38.0161
241	trop	IRGC 128301	IRIS_313-10722	GODAWEL::IRGC 15750-1	Sri Lanka	93.8349	79.6823
242	trop	IRGC 128316	IRIS_313-11915	IB 95::IRGC 74677-1	Ghana	91.4574	60.6452
243	trop	IRGC 128317	IRIS_313-11494	IC 25690::IRGC 53973-1	India	52.3672	16.6707
244	trop	IRGC 128362	IRIS_313-12200	LEUANG::IRGC 90000-1	Laos	52.7116	8.05799
245	trop	IRGC 128381	IRIS_313-11658	MANYALOJOPOIHUN::IRGC 63350-1	Sierra Leone	78.6423	66.0255
246	trop	IRGC 128385	IRIS_313-11396	MAS::IRGC 48758-1	Indonesia	90.0051	68.6292
247	trop	IRGC 128400	IRIS_313-11924	NAM JAM::IRGC 75069-1	Thailand	29.6529	14.1722
248	trop	IRGC 128415	IRIS_313-10752	O. SATIVA::IRGC 16898-1	United States	85.4673	55.1454
249	trop	IRGC 128418	IRIS_313-10703	PADI ADONG DUMARAT::IRGC 14356-1	Malaysia	68.2883	11.4187
250	trop	IRGC 128443	IRIS_313-10620	R 27::IRGC 9498-1	Brazil	57.1538	14.0178
251	trop	IRGC 128457	IRIS_313-12281	SALAZANA::IRGC 97219-1	Madagascar	46.3306	37.4635
252	trop	IRGC 128472	IRIS_313-11926	SI NAM PUENG::IRGC 75165-1	Thailand	27.012	11.8014
253	trop	IRGC 128497	IRIS_313-12322	VOK::IRGC 99831-1	Laos	23.6887	13.5003
254	trop	IRGC 128520	IRIS_313-12266	KAUK PAHLING::IRGC 95823-2	Myanmar	89.9479	46.2212
255	trop	IRGC 128522	IRIS_313-11077	LAI HANG HMA::IRGC 29608-2	Laos	45.8025	22.8237
256	trop	IRGC 131990	IRIS_313-10541	IACA ESCURO::IRGC 6636-1	Guinea-Bissau	94.7858	97.6259
257	trop	IRGC 131992	IRIS_313-12021	ITA 131::IRGC 80025-1	Nigeria	80.1392	37.4903
258	trop	IRGC 132017	IRIS_313-12353	MOK::IRGC 107804-1	Laos	84.2634	69.89
259	trop	IRGC 132042	IRIS_313-10960	SUNGKAI::IRGC 25812-1	Indonesia	62.5047	47.2856
260	trop	IRGC 132044	IRIS_313-11397	TAMBU::IRGC 48932-1	Indonesia	89.3581	87.5111
261	trop	IRGC 132047	IRIS_313-11659	TOBOHUN::IRGC 63433-1	Sierra Leone	92.3104	61.2716
262	trop	IRGC 132247	IRIS_313-11105	D 3-130::IRGC 30986-2	Liberia	55.6425	50.0064
263	trop	IRGC 132249	IRIS_313-11121	GBRA::IRGC 32474-2	Liberia	97.578	53.6423
264	trop	IRGC 132251	IRIS_313-11159	HYB 5-2-1-1-4::IRGC 34283-2	Ivory Coast	45.5437	37.4425
265	trop	IRGC 132255	IRIS_313-11337	LAWA AN::IRGC 44544-2	Philippines	66.4696	47.4049
266	trop	IRGC 132264	IRIS_313-10922	R 258::IRGC 23702-2	Laos	15.213	25.1681
267	trop	IRGC 132266	IRIS_313-11161	SADU::IRGC 34514-2	Liberia	93.0819	62.5218
268	trop	IRGC 132274	IRIS_313-11094	MAK BOUAP::IRGC 30106-3	Laos	80.7368	25.5276
269	trop	IRGC 132296	IRIS_313-12279	RAMADITRA::IRGC 97124-1	Madagascar	92.0117	77.6557
270	trop	IRGC 132304	IRIS_313-12289	YARSABA::IRGC 97567-1	Myanmar	55.2977	29.4582
271	trop	IRGC 132307	IRIS_313-11127	BUBAW::IRGC 32989-2	Myanmar	71.7108	70.1711
272	trop	IRGC 132312	IRIS_313-11376	TOS 7536::IRGC 46985-2	Ivory Coast	58.9258	58.9966
273	trop	IRGC 132379	IRIS_313-11314	PELAU::IRGC 43538-2	Indonesia	86.1352	76.2366
274	trop	IRGC 135521	IRIS_313-7859	CIRAD 358::C1	Ivory Coast	67.6915	48.357
275	trop	IRGC 135576	IRIS_313-12285	PADI MIAT (KECIL)::IRGC 97366-1	Malaysia	82.1309	78.278
276	trop	IRGC 135639	IRIS_313-11340	MINANOK::IRGC 44637-2	Philippines	95.4375	76.104
277	trop	IRGC 135754	IRIS_313-11892	HO MOK::IRGC 73171-3	Thailand	64.609	34.6836
